# Supplementary material for: Construction of composite films using carbon nanodots for blocking ultraviolet light from the Sun
Source: Royal Society of Chemistry journal article supplement (doi:10.1039/d3ra04123a), 2023-01-01
Supplement: d3ra04123a1.pdf [file d3ra04123a1.pdf]

## Supporting information

### Construction of Composite Films Using Carbon Nanodots for Blocking Ultraviolet Light from the Sun

Yibing Bai<sup>a</sup>, Bin Zhao<sup>a</sup>, Jiaxin Ni<sup>a</sup>, Lianhang Sun<sup>a</sup>, Yuning Wang<sup>a</sup>, Jing Wang<sup>a</sup>, Yu  
Liu<sup>a</sup>, Shiyang Han<sup>a,\*</sup>, Fugang Gao<sup>b</sup>, Chunlei Zhang<sup>a,\*</sup>

<sup>a</sup> Key Laboratory of Bio-Based Material Science & Technology (Northeast Forestry University), Ministry of Education, Harbin 150040, China

<sup>b</sup> Jiangsu Transline Technology Co., Ltd., Changzhou 213100, China

\* Corresponding author at: Key Laboratory of Bio-based Material Science and Technology of Ministry of Education, Northeast Forestry University, Hexing Road 26, Harbin 150040, P.R. China.

E-mail addresses: hanshiyan80@163.com (S. Han), zhangchunlei@nefu.edu.cn (C. Zhang).

## **Characterization**

The morphology of the samples was analyzed using a JEM-2100 transmission electron microscope (JEOL Ltd., Tokyo, Japan). An ESCALAB 250Xi spectrometer (Thermo Fisher Scientific, New York, USA) was used for X-ray photoelectron spectroscopy. Fourier-transform infrared (FTIR) spectra, recorded using a Fourier FT-IR spectrometer (Perkin Elmer Inc., Waltham, MA, USA), were used to identify surface functional groups on the CNDs. X-ray diffraction (XRD) patterns were measured using an X'Pert 3 Powder X-ray diffractometer (Malvern Panalytical Ltd., Malvern, UK). UV-visible absorption spectra were recorded using a TU-1901 UV-visible fluorescence spectrometer (Persee General Instrument Co., Ltd., Beijing, China). The photoluminescence spectra of the samples were recorded using an LS55 fluorescence spectrometer (Perkin Elmer Co., Ltd., Waltham, MA, USA). Photoluminescence quantum yield and fluorescence lifetime decay curves were measured using an FLS1000 fluorescence spectrometer (Edinburgh Instruments Ltd., Edinburgh, UK). Electroluminescence spectra were recorded using an OHSP350 spectrometer (Hongpu Photoelectric Technology Co., Ltd., Hangzhou, China). Stress-strain curves were measured using an UTM2203 electronic universal testing machine (Shenzhen Suns Technology Stock Co., Ltd., Shenzhen, China).

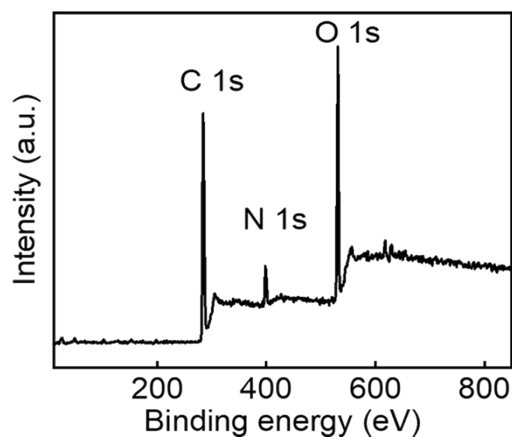

**Figure S1.** Full X-ray photoelectron spectrum of hydrothermal product formed from chitosan alone.

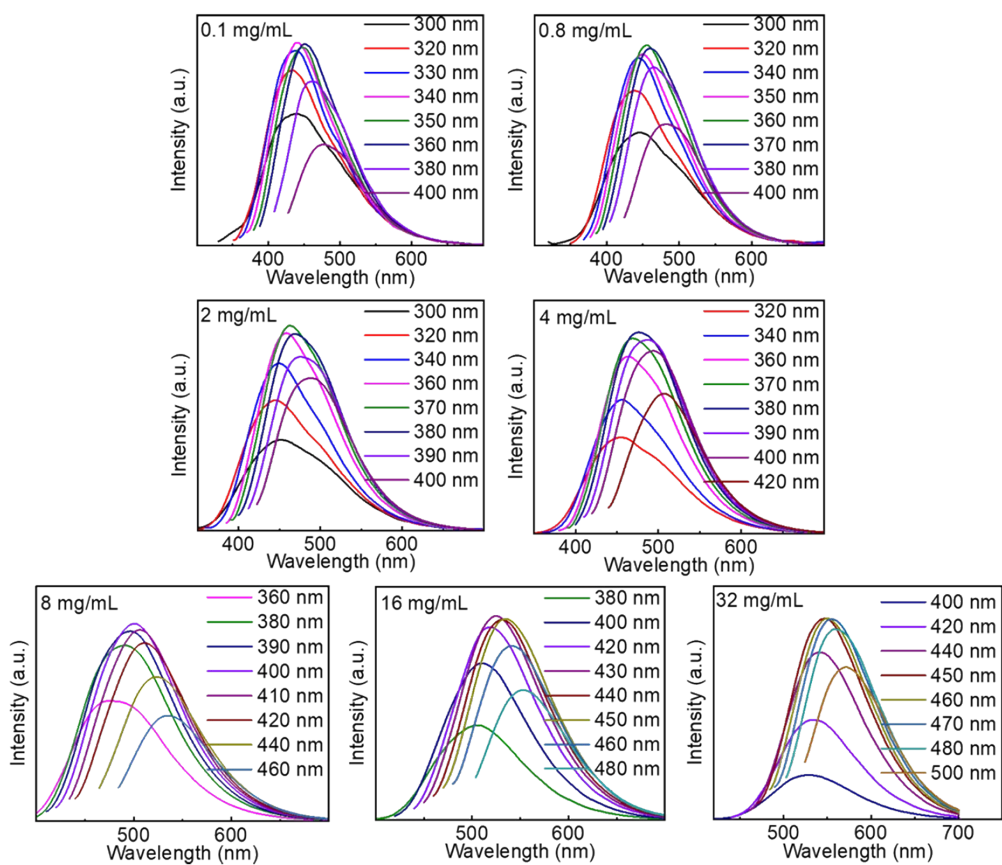

**Figure S2.** Fluorescence emission spectra of aqueous solutions of CNDs with different concentrations (0.1–32 mg/mL).

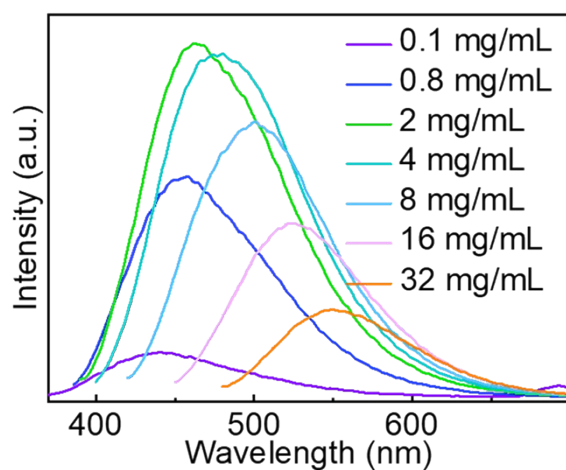

**Figure S3.** Emission spectra of aqueous solution of CNDs with different concentrations (0.1-32 mg/mL) at optimal excitation.

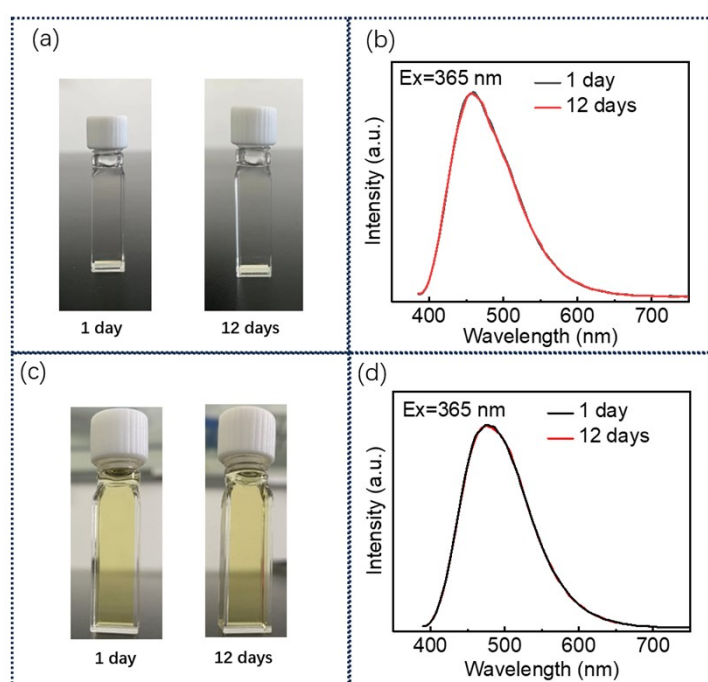

**Figure S4** Photos under natural light and fluorescence spectra (Ex=365 nm) of 0.2mg/mL (a, b) and 2mg/mL (c,d) CNDs solution at 1 and 12 days

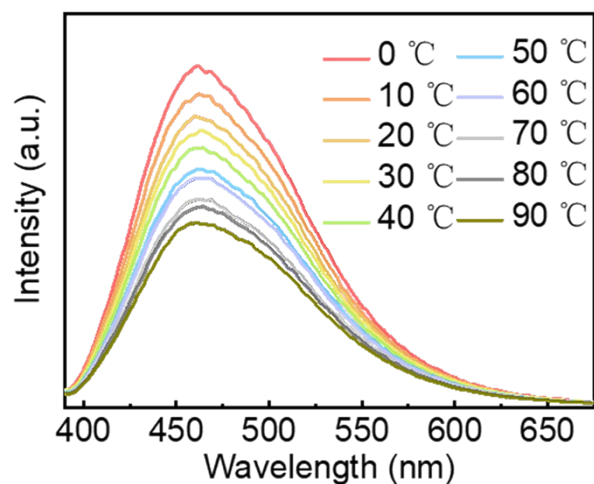

**Figure S5.** Fluorescence emission spectra of solutions of CNDs at different temperatures (2 mg/mL, Ex=370 nm).

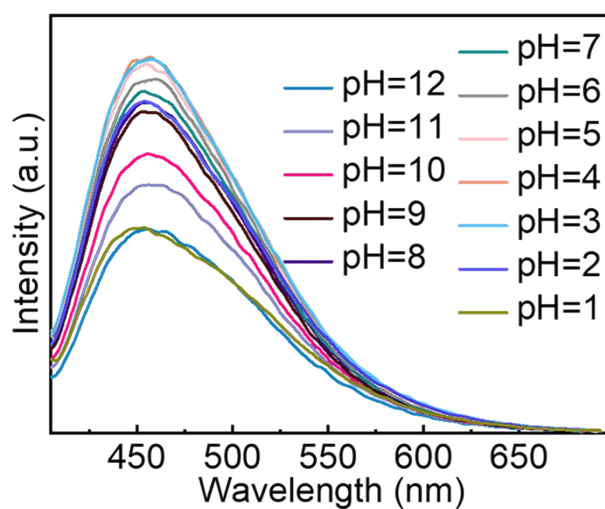

**Figure S6.** Fluorescence emission spectra of solutions of CNDs at different pH (2 mg/mL, Ex=370 nm).

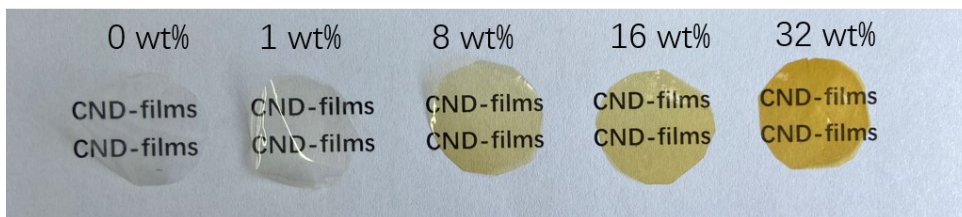

Figure S7 Photos of different CND-films under natural light

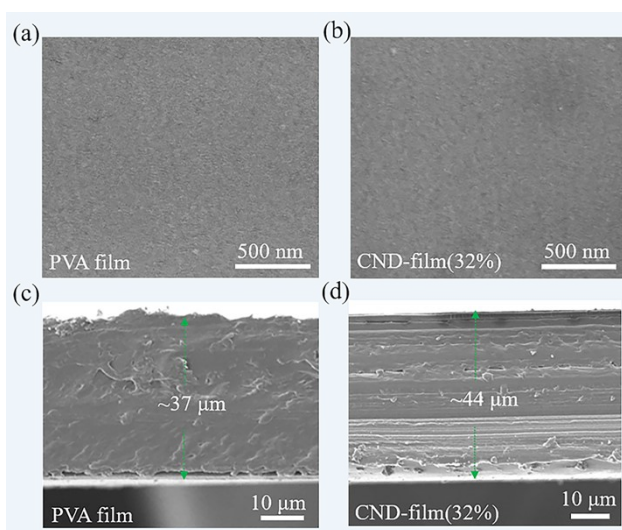

Figure S8. SEM images of (a) PVA film and (b) CND-film (32%); SEM images showing thickness of (c) PVA film and (d) CND-film (32%).

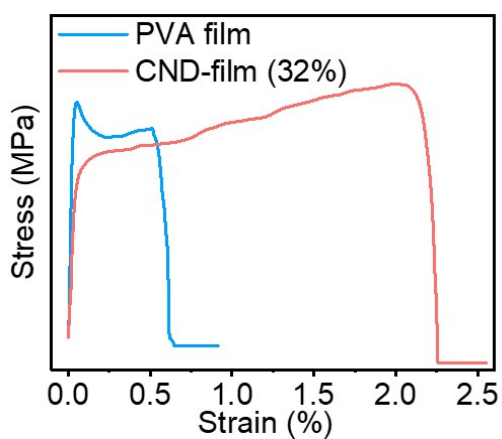

Figure S9. Mechanical experiment of PVA film and CND-film (32%)

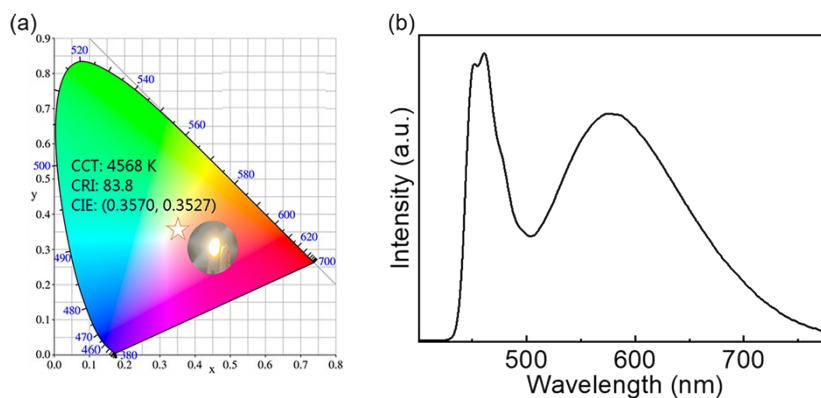

**Figure S10.** (a) CIE1931 chromaticity diagram (inset: Photo of WLED after energization); (b) Electroluminescence spectrum of WLED.

**Table S1.** Proportion of C, N, and O-containing chemical bonds in CNDs and hydrothermal product formed from chitosan alone.

| Sample   | C (%) | N (%) | O (%) |
|----------|-------|-------|-------|
| CNDs     | 54.22 | 25.77 | 20.01 |
| Chitosan | 67.27 | 6.85  | 25.88 |

**Table S2.** Fluorescence lifetime of solution of CNDs.

| Sample        | $\tau_1$ (ns) | $A_1$ (%) | $\tau_2$ (ns) | $A_2$ (%) | Average lifetime (ns) |
|---------------|---------------|-----------|---------------|-----------|-----------------------|
| CNDs solution | 7.19          | 59.04     | 2.15          | 40.96     | 5.67                  |

**Table S3.** Photoluminescence quantum yields (PLQY) of different CNDs

| Raw materials                                  | Synthetic method | PLQY           | Reference |
|------------------------------------------------|------------------|----------------|-----------|
| Microcrystalline cellulose                     | Hydrothermal     | 6.3%           | [1]       |
| Rosin and ethylenediamine                      | Hydrothermal     | 21.5%          | [2]       |
| Microcrystalline cellulose and ethylenediamine | Hydrothermal     | 10.1%          | [3]       |
| Alkali lignin, citric acid and ethylenediamine | Hydrothermal     | 43% (Relative) | [4]       |
| Citric acid and diethylenetriamine             | Hydrothermal     | 39 %           | [5]       |
| 3-Aminophenylboronic acid and citric acid      | Hydrothermal     | 35% (Relative) | [6]       |
| Chitosan and ethylenediamine                   | Hydrothermal     | 45%            | This work |

### References

1. Y. Han, Y. Wang, B. Zhao, Y. Bai, S. Han, Y. Zhang, S. Li, Z. Chen, C. Si, H. Yu, C. Zhang and W. Yu, *Advanced Composites and Hybrid Materials*, 2023, **6**.
2. M. Ge, Y. Han, J. Ni, Y. Li, S. Han, S. Li, H. Yu, C. Zhang, S. Liu, J. Li and Z. Chen, *Chemical Engineering Journal*, 2021, **413**.
3. Y. Han, X. Huang, J. Liu, J. Ni, Y. Bai, B. Zhao, S. Han and C. Zhang, *J Colloid Interface Sci*, 2022, **617**, 44-52.
4. B. Xue, Y. Yang, Y. Sun, J. Fan, X. Li and Z. Zhang, *Int J Biol Macromol*, 2019, **122**, 954-961.
5. D. Ozyurt, S. Shafqat, T. T. Pakkanen, R. K. Hocking, A. Mouritz and B. Fox, *Carbon*, 2021, **175**, 576-584.
6. Y. Hu, R. Guan, S. Zhang, X. Fan, W. Liu, K. Zhang, X. Shao, X. Li and Q. Yue, *Food Chem*, 2022, **372**, 131287.
